# Supplementary material for: Rice straw-derived biochar reduces nitrogen losses and greenhouse gas emissions while improving rice productivity and agronomic efficiency in a tropical paddy soil
Source: Research Square preprint supplement (doi:10.21203/rs.3.rs-8607079/v1), 2026-02-17
Supplement: Supplementary file 1 [file a703c9fa7308c9c7ba6f1048.docx]

**Supplementary Information**

**Figure**


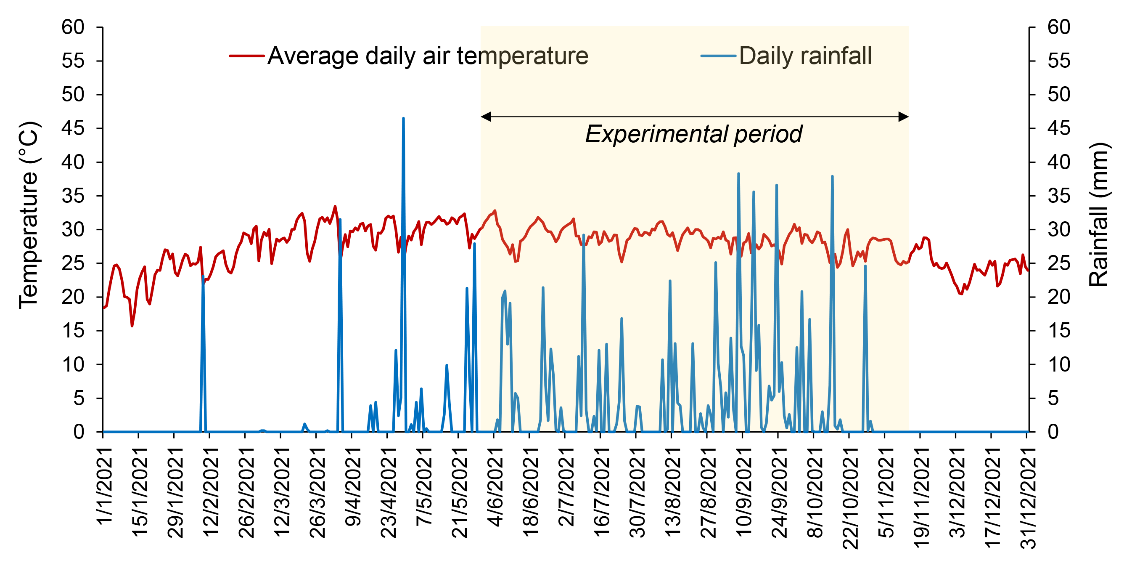


**Fig. S1.** The average daily air temperature and daily rainfall recorded during the experimental period.

**Tables**

|  | [1] | [2] | [3] | [4] | [5] | [6] | [7] | [8] | [9] | [10] | [11] | [12] | [13] | [14] |
| --- | --- | --- | --- | --- | --- | --- | --- | --- | --- | --- | --- | --- | --- | --- |
| [1] Exc. NH4+-N | 1.0 |  |  |  |  |  |  |  |  |  |  |  |  |  |
| [2] Exc. NO3--N | .92** | 1.0 |  |  |  |  |  |  |  |  |  |  |  |  |
| [3] Mineral N | 1.0** | .92** | 1.0 |  |  |  |  |  |  |  |  |  |  |  |
| [4] Organic N | .98** | .93** | .98** | 1.0 |  |  |  |  |  |  |  |  |  |  |
| [5] Total N | .99** | .93** | .99** | 1.0** | 1.0 |  |  |  |  |  |  |  |  |  |
| [6] TOC | .90** | .93** | .90** | .91** | .91** | 1.0 |  |  |  |  |  |  |  |  |
| [7] CEC | .56 | .36 | .56 | .53 | .53 | .31 | 1.0 |  |  |  |  |  |  |  |
| [8] soil pH | .36 | .41 | .36 | .39 | .39 | .55 | .13 | 1.0 |  |  |  |  |  |  |
| [9] soil Eh | .64* | .65* | .64* | .66* | .66* | .77** | .16 | .73** | 1.0 |  |  |  |  |  |
| [10] Straw | .33 | .28 | .33 | .34 | .34 | .41 | .37 | .34 | .07 | 1.0 |  |  |  |  |
| [11] Grain | .86** | .89** | .89** | .91** | .91** | .91** | .49 | .48 | .56 | .67* | 1.0 |  |  |  |
| [12] White grain | .89** | .89** | .89** | .91** | .91** | .91** | .49 | .48 | .56 | .67* | 1.0** | 1.0 |  |  |
| [13] Husk | .88** | .89** | .88** | .90** | .90** | .91** | .47 | .49 | .56 | .67* | 1.0** | 1.0** | 1.0 |  |
| [14] NAE | .86** | .81** | .86** | .88** | .88** | .84** | .61* | .45 | .50 | .73** | .98** | .98** | .98** | 1.0 |

**Table S1.** Pearson’s correlation coefficients (r) among soil chemical properties, rice yields, and agronomic efficiency at the harvest stage. * and ** indicate significance at p < 0.05 and p < 0.01, with n = 12. Abbreviations: Exc. NH4+-N: exchangeable ammonium-nitrogen concentration in the soil; Exc. NO3--N: exchangeable nitrate-nitrogen concentration in the soil; Mineral N: mineral nitrogen; Organic N: organic nitrogen; Total N: total nitrogen; TOC: total organic carbon; CEC: cation exchange capacity; soil Eh: field soil redox potential; Straw: rice straw biomass; Grain: rice grain yield; White grain: white rice grain yield; Husk: rice husk biomass; NAE: agronomic efficiency of applied nitrogen.

|  | [1] | [2] | [3] | [4] | [5] | [6] | [7] | [8] | [9] | [10] | [11] | [12] | [13] | [14] | [15] |
| --- | --- | --- | --- | --- | --- | --- | --- | --- | --- | --- | --- | --- | --- | --- | --- |
| [1] [NH4+-N] in leachate | 1.0 |  |  |  |  |  |  |  |  |  |  |  |  |  |  |
| [2] [NO3--N] in leachate | -.27 | 1.0 |  |  |  |  |  |  |  |  |  |  |  |  |  |
| [3] NH3 volatilization | -.25 | -.30* | 1.0 |  |  |  |  |  |  |  |  |  |  |  |  |
| [4] N2O emission | .15 | .11 | -.27 | 1.0 |  |  |  |  |  |  |  |  |  |  |  |
| [5] [NH4+-N] in soil solution | .82** | -.29* | -.23 | .02 | 1.0 |  |  |  |  |  |  |  |  |  |  |
| [6] [NO3--N] in soil solution | -.33* | .61** | -.09 | -.12 | -.33* | 1.0 |  |  |  |  |  |  |  |  |  |
| [7] Soil pH | -.09 | .09 | .04 | -.06 | -.34* | .14 | 1.0 |  |  |  |  |  |  |  |  |
| [8] Soil Eh | .37* | -.45** | .05 | -.00 | .37* | -.60** | .08 | 1.0 |  |  |  |  |  |  |  |
| [9] TOC | -.31* | .01 | .19 | .13 | -.35* | -.38** | .33* | .43** | 1.0 |  |  |  |  |  |  |
| [10] CEC | -.26 | -.14 | -.30* | .05 | -.24 | -.25 | -.03 | -.20 | .33* | 1.0 |  |  |  |  |  |
| [11] Total N | -.25 | .68** | -.42** | .26 | -.33* | .31* | .24 | -.21 | .27 | .02 | 1.0 |  |  |  |  |
| [12] Organic N | -.25 | .68** | -.42** | .25 | -.33* | .32* | .24 | -.21 | .26 | .02 | 1.0** | 1.0 |  |  |  |
| [13] Mineral N | -.31* | .39** | -.31* | .31* | -.38** | -.05 | .25 | -.00 | .56** | .23 | .84** | .84** | 1.0 |  |  |
| [14] Exchangeable NH4+-N | -.30* | .39** | -.31* | .31* | -.38** | -.05 | .25 | .01 | .57** | .22 | .84** | .84** | 1.0** | 1.0 |  |
| [15] Exchangeable NO3--N | -.29* | .03 | -.06 | .08 | -.32* | -.17 | -.02 | -.53** | .07 | .52** | .11 | .10 | .23 | .21 | 1.0 |

**Table S2*.*** Pearson’s correlation coefficients (*r*) among soil N losses and soil chemical properties during the rice cultivation. * and ** indicate significance at *p* < 0.05 and *p* < 0.01, n = 48. Abbreviations: [NH4+-N] in leachate: ammonium-nitrogen concentration in the leachate; [NO3--N] in leachate: nitrate-nitrogen concentration in the leachate; [NH4+-N] in soil solution: ammonium-nitrogen concentration in the soil solution; [NO3--N] in soil solution: nitrate-nitrogen concentration in the soil solution; soil Eh, field soil redox potential; TOC, total organic carbon; CEC, cation exchange capacity; Total N: total nitrogen; Organic N: organic nitrogen; Mineral N: mineral nitrogen; Exchangeable NH4+-N: exchangeable ammonium-nitrogen concentration in the soil; Exchangeable NO3--N: exchangeable nitrate-nitrogen concentration in the soil.
